# Supplementary material
Source: PubMed Central journal article supplement (PMC3895408)
Supplement: NIHMS516786-supplement-02.pdf [file NIHMS516786-supplement-02.pdf]

**Table 3 Characteristics of the three fundus appearance categories.**

| <b>Fundus appearance category</b>   | <b>1 (n=11)</b> | <b>2 (n=20)</b> | <b>3 (n=9)</b> |                |
|-------------------------------------|-----------------|-----------------|----------------|----------------|
|                                     |                 |                 |                | <b>p value</b> |
| <b>Age (years)</b>                  |                 |                 |                |                |
| Mean (SD)                           | 19.5 (10.6)     | 27.5 (13.7)     | 25.9 (9.9)     |                |
| Range                               | 6-33            | 12-52           | 11-43          |                |
| Median                              | 22              | 23.5            | 25             | 0.22           |
| <b>Visual acuity (logMAR)</b>       |                 |                 |                |                |
| Mean (SD)                           | 0.92 (0.13)     | 0.90 (0.09)     | 0.94 (0.2)     |                |
| Range                               | 0.72-1.16       | 0.74-1.1        | 0.8-1.32       |                |
| Median                              | 0.9             | 0.9             | 0.84           | 0.68           |
| <b>Contrast sensitivity (logCS)</b> |                 |                 |                |                |
| Mean (SD)                           | 1.22 (0.19)     | 1.18 (0.24)     | 1.06 (0.21)    |                |
| Range                               | 0.90-1.45       | 0.70-1.55       | 0.50-0.9       |                |
| Median                              | 1.25            | 1.2             | 0.7            | 0.25           |
| <b>Reading acuity (logMAR)</b>      |                 |                 |                |                |
| Mean (SD)                           | 0.77 (0.15)     | 0.77 (0.23)     | 0.72 (0.14)    |                |
| Range                               | 0.58-1.00       | 0.54 -1.05      | 0.5-0.9        |                |
| Median                              | 0.8             | 0.7             | 0.7            | 0.8            |
| <b>Retinal sensitivity (dB)</b>     |                 |                 |                |                |
| Mean (SD)                           | 16.9 (1.9)      | 17.3 (2.6)      | 14.5 (5.5)     |                |
| Range                               | 14.9-19.8       | 12.8-19.9       | 3.1-19.7       |                |
| Median                              | 17.6            | 18.4            | 16.7           | 0.38           |
| <b>BCEA (degrees)</b>               |                 |                 |                |                |
| Mean (SD)                           | 19.5 (20.9)     | 10.3 (8.6)      | 13.2 (9.7)     |                |
| Range                               | 3.9-65          | 2.3-38.5        | 2.5-32.9       |                |
| Median                              | 13.7            | 7.4             | 15.1           | 0.69           |

Fundus appearance category: 1=no RPE disturbance; 2=RPE disturbance; 3=Atrophy present.

logMAR = logarithm of the minimum angle of resolution; logCS = logarithm of contrast sensitivity; SD = standard deviation; dB = decibel; BCEA = bivariate contour ellipse area; RPE = retinal pigment epithelium.
