# Supplementary material
Source: PubMed Central journal article supplement (PMC3895408)
Supplement: NIHMS516786-supplement-03.pdf [file NIHMS516786-supplement-03.pdf]

**Table 5 Characteristics of the five optical coherence tomography categories.**

| OCT Group                           | 1 (n=9)     | 2 (n=11)    | 3 (n=8)     | 4 (n=9)     | 5 (n=3)     | p value |
|-------------------------------------|-------------|-------------|-------------|-------------|-------------|---------|
| <b>Age (years)</b>                  |             |             |             |             |             |         |
| Mean (SD)                           | 26.8 (18.0) | 23.8 (9.5)  | 20.6 (10.9) | 28.2 (12.8) | 25 (2)      | 0.77    |
| Range                               | 6-52        | 11-35       | 7-43        | 11-49       | 23-27       |         |
| Median                              | 24          | 24          | 18          | 28          | 25          |         |
| <b>Visual acuity (logMAR)</b>       |             |             |             |             |             |         |
| Mean (SD)                           | 0.95 (0.13) | 0.91 (0.10) | 0.96 (0.16) | 0.85 (0.08) | 0.93 (0.23) | 0.44    |
| Range                               | 0.72-1.1    | 0.76-1.16   | 0.8-1.32    | 0.74-0.96   | 0.76-1.2    |         |
| Median                              | 0.94        | 0.9         | 0.92        | 0.86        | 0.84        |         |
| <b>Contrast sensitivity (logCS)</b> |             |             |             |             |             |         |
| Mean (SD)                           | 1.09 (0.33) | 1.12 (0.25) | 1.16 (0.16) | 1.25 (0.13) | 1.25 (0.1)  | 0.57    |
| Range                               | 0.5-1.45    | 0.65-1.55   | 1-1.45      | 1.05-1.45   | 1.15-1.35   |         |
| Median                              | 1.2         | 1.2         | 1.12        | 1.25        | 1.25        |         |
| <b>Reading acuity (logMAR)</b>      |             |             |             |             |             |         |
| Mean (SD)                           | 0.92 (0.25) | 0.78 (0.13) | 0.70 (0.16) | 0.66 (0.13) | 0.68 (0.11) | 0.02*   |
| Range                               | 0.6-1.32    | 0.54-0.9    | 0.5-0.9     | 0.5-0.92    | 0.56-0.77   |         |
| Median                              | 0.99        | 0.8         | 0.65        | 0.68        | 0.7         |         |
| <b>Retinal sensitivity (dB)</b>     |             |             |             |             |             |         |
| Mean (SD)                           | 16.1 (2.8)  | 17.2 (2.1)  | 16.9 (4)    | 17.4 (2.1)  | 12.3 (8.1)  | 0.21    |
| Range                               | 12.8-19.8   | 13.6-19.8   | 7.8-19.9    | 14.3-19.7   | 3.1-18.4    |         |
| Median                              | 14.9        | 17.6        | 18          | 17.8        | 15.4        |         |
| <b>BCEA (degrees)</b>               |             |             |             |             |             |         |
| Mean (SD)                           | 21.3 (19.7) | 10.1 (5.3)  | 13.9 (12.9) | 9.2 (11.9)  | 14.3 (16.2) | 0.34    |
| Range                               | 3.8-40.8    | 2.5-16.8    | 4.7-44      | 1.7-37.5    | 3.6-32.9    |         |
| Median                              | 14.4        | 10.2        | 8.5         | 3.75        | 6.4         |         |

OCT category: 1=continuous ISe; 2=ISe disruption; 3=ISe absence; 4=Hyporeflective zone present; 5=Outer retinal atrophy. \*Bonferroni post-hoc analysis shows a significant difference in reading acuity between OCT category 1 and 4.

logMAR = logarithm of the minimum angle of resolution; logCS = logarithm of contrast sensitivity; SD = standard deviation; dB = decibel; BCEA = bivariate contour ellipse area; OCT = optical coherence tomography; ISe = inner segment ellipsoid.
