# Supplementary material
Source: PubMed Central journal article supplement (PMC3895408)
Supplement: NIHMS516786-supplement-04.pdf [file NIHMS516786-supplement-04.pdf]

**Table 6 Characteristics of patients with and without foveal hypoplasia.**

| <b>Hypoplasia</b>                   | <b>No (n=17)</b> | <b>Yes (n=21)</b> | <b>p value</b> |
|-------------------------------------|------------------|-------------------|----------------|
| <b>Age (years)</b>                  |                  |                   |                |
| Mean (SD)                           | 28.4 (14.6)      | 22 (10.3)         | 0.19           |
| Range                               | 6-52             | 7-49              |                |
| Median                              | 29               | 22                |                |
| <b>Visual acuity (logMAR)</b>       |                  |                   |                |
| Mean (SD)                           | 0.98 (0.14)      | 0.85 (0.07)       | <0.01          |
| Range                               | 0.72-1.16        | 0.74-0.96         |                |
| Median                              | 0.96             | 0.86              |                |
| <b>Contrast sensitivity (logCS)</b> |                  |                   |                |
| Mean (SD)                           | 1.07 (0.29)      | 1.23 (0.14)       | 0.39           |
| Range                               | 0.5-1.55         | 0.9-1.45          |                |
| Median                              | 1.05             | 1.25              |                |
| <b>Reading acuity (logMAR)</b>      |                  |                   |                |
| Mean (SD)                           | 0.90 (0.18)      | 0.65 (0.12)       | <0.01          |
| Range                               | 0.6-1.32         | 0.5-0.9           |                |
| Median                              | 0.86             | 0.62              |                |
| <b>Retinal sensitivity (dB)</b>     |                  |                   |                |
| Mean (SD)                           | 15.7 (3.1)       | 17.9 (1.86)       | 0.15           |
| Range                               | 12.8-19.8        | 13.8-19.8         |                |
| Median                              | 15.6             | 18.4              |                |
| <b>BCEA (degrees)</b>               |                  |                   |                |
| Mean (SD)                           | 15.1 (16.1)      | 11.7 (10.9)       | 0.43           |
| Range                               | 1.7-40.7         | 3.7-37.4          |                |
| Median                              | 9.4              | 7.3               |                |
| <b>Mutation</b>                     | %                | %                 |                |
| <i>CNGA3</i>                        | 35               | 52                |                |
| <i>CNGB3</i>                        | 35               | 38                |                |
| <i>GNAT2</i>                        | 24               | 0                 |                |
| <i>PDE6C</i>                        | 6                | 0                 |                |
| Unknown                             | 0                | 10                |                |

The percentage of patients within the 4 genotypes is also shown.

logMAR = logarithm of the minimum angle of resolution; logCS = logarithm of contrast sensitivity; SD = standard deviation; dB = decibel; BCEA = bivariate contour ellipse area.
