# Supplementary material
Source: PubMed Central journal article supplement (PMC3895408)
Supplement: NIHMS516786-supplement-05.pdf [file NIHMS516786-supplement-05.pdf]

**Table 7 Characteristics of the four different genotype categories.**

| <b>Genotype</b>                     | <b>CNGA3<br/>(n=18)</b> | <b>CNGB3<br/>(n=15)</b> | <b>GNAT2<br/>(n=4)</b> | <b>PDE6C<br/>(n=1)</b> |                  |
|-------------------------------------|-------------------------|-------------------------|------------------------|------------------------|------------------|
|                                     |                         |                         |                        |                        | <b>p value *</b> |
| <b>Age (years)</b>                  |                         |                         |                        |                        |                  |
| Mean (SD)                           | 24.1 (10.6)             | 20.4 (11.0)             | 43.3 (10.2)            | 43                     |                  |
| Range                               | 7-49                    | 6-47                    | 29-52                  |                        |                  |
| Median                              | 24.5                    | 18                      | 46                     |                        | 0.21             |
| <b>Visual acuity (logMAR)</b>       |                         |                         |                        |                        |                  |
| Mean (SD)                           | 0.89 (0.1)              | 0.90 (0.13)             | 0.98 (0.09)            | 1.32                   |                  |
| Range                               | 0.74-1.16               | 0.72-1.2                | 0.88-1.1               |                        |                  |
| Median                              | 0.9                     | 0.9                     | 0.97                   |                        | 0.76             |
| <b>Contrast sensitivity (logCS)</b> |                         |                         |                        |                        |                  |
| Mean (SD)                           | 1.18 (0.22)             | 1.21 (0.16)             | 0.86 (0.32)            | 1.05                   |                  |
| Range                               | 0.65-1.55               | 0.9-1.45                | 0.5-1.2                |                        |                  |
| Median                              | 1.2                     | 1.25                    | 0.88                   |                        | 0.91             |
| <b>Reading acuity (logMAR)</b>      |                         |                         |                        |                        |                  |
| Mean (SD)                           | 0.72 (0.12)             | 0.73 (0.16)             | 1.12 (0.17)            | 0.9                    |                  |
| Range                               | 0.5-0.9                 | 0.54-1.00               | 0.92-1.32              |                        |                  |
| Median                              | 0.7                     | 0.7                     | 1.13                   |                        | 0.96             |
| <b>Retinal sensitivity (dB)</b>     |                         |                         |                        |                        |                  |
| Mean (SD)                           | 16.1 (3.8)              | 18.1 (1.76)             | 13.8 (0.96)            | 7.8                    |                  |
| Range                               | 3.1-19.6                | 15.4-19.8               | 12.8-14.8              |                        |                  |
| Median                              | 17.5                    | 18.4                    | 13.7                   |                        | 0.04             |
| <b>BCEA (degrees)</b>               |                         |                         |                        |                        |                  |
| Mean (SD)                           | 13.6 (13.4)             | 13.2 (16.3)             | 14.0 (9.8)             | 17.1                   |                  |
| Range                               | 2-44                    | 3.7-65                  | 1.7-24                 |                        |                  |
| Median                              | 9.0                     | 7.3                     | 15.1                   |                        | 0.82             |
| <b>OCT group</b>                    | %                       | %                       | %                      |                        |                  |
| 1                                   | 11.1                    | 26.7                    | 75                     |                        |                  |
| 2                                   | 44.4                    | 20                      | 0                      |                        |                  |
| 3                                   | 16.5                    | 13.3                    | 0                      | 100                    |                  |
| 4                                   | 22.5                    | 26.7                    | 25                     |                        |                  |
| 5                                   | 5.5                     | 13.3                    | 0                      |                        |                  |
| <b>Fundus appearance</b>            | %                       | %                       | %                      |                        |                  |
| 1                                   | 44.4                    | 20                      | 0                      |                        |                  |
| 2                                   | 33.3                    | 53                      | 100                    |                        |                  |
| 3                                   | 22.3                    | 27                      | 0                      |                        |                  |

\*Statistical comparisons are between *CNGA3* and *CNGB3* groups only.

logMAR = logarithm of the minimum angle of resolution; logCS = logarithm of contrast sensitivity; SD = standard deviation; dB = decibel; BCEA = bivariate contour ellipse area; OCT = optical coherence tomography.
